# Supplementary material for: Prediction of local recurrence risk after neoadjuvant chemotherapy in patients with primary breast cancer: Clinical utility of the MD Anderson Prognostic Index
Source: PubMed Central journal article supplement (PMC6355200; doi:10.1371/journal.pone.0211337), 2019-01-31
Supplement: pone.0211337.s001.pdf [file pone.0211337.s001.pdf]

**S1 Table** 5-year LR (A), 5-year LRR (B), 5-year LRR without DM (C) and 5-year DM rates (D) stratified by MDAPI risk groups and surgical procedure

**A**

| MDAPI          | Number of patients |       | LR |      | 95% CI |      | pvalue |
|----------------|--------------------|-------|----|------|--------|------|--------|
|                | n                  | %     | n  | %    |        |      |        |
| <b>Overall</b> | 450                | 100.0 | 24 | 0.06 | 0.04   | 0.09 | 0.005  |
| Low-risk       | 374                | 83.1  | 14 | 0.05 | 0.02   | 0.07 |        |
| Intermed.-risk | 64                 | 14.2  | 9  | 0.16 | 0.06   | 0.25 |        |
| High-risk      | 12                 | 2.7   | 1  | 0.11 | 0      | 0.3  |        |
| <b>BET</b>     | 260                | 100.0 | 11 | 0.05 | 0.02   | 0.08 | 0.05   |
| Low-risk       | 239                | 91.9  | 8  | 0.04 | 0.01   | 0.07 |        |
| Intermed.-risk | 18                 | 6.9   | 3  | 0.17 | 0      | 0.32 |        |
| High-risk      | 3                  | 1.2   | 0  | 0    | 0      | 0    |        |
| <b>ME</b>      | 190                | 100.0 | 13 | 0.08 | 0.04   | 0.13 | 0.1    |
| Low-risk       | 135                | 71.0  | 6  | 0.05 | 0.01   | 0.09 |        |
| Intermed.-risk | 46                 | 24.2  | 6  | 0.16 | 0.03   | 0.27 |        |
| High-risk      | 9                  | 4.8   | 1  | 0.15 | 0      | 0.39 |        |

**B**

| MDAPI          | Number of patients |       | LRR |      | 95% CI |      | pvalue |
|----------------|--------------------|-------|-----|------|--------|------|--------|
|                | n                  | %     | n   | %    |        |      |        |
| <b>Overall</b> | 450                | 100.0 | 40  | 0.1  | 0.07   | 0.13 | 0.03   |
| Low-risk       | 374                | 83.1  | 27  | 0.08 | 0.05   | 0.11 |        |
| Intermed.-risk | 64                 | 14.2  | 11  | 0.19 | 0.08   | 0.28 |        |
| High-risk      | 12                 | 2.7   | 2   | 0.23 | 0      | 0.46 |        |
| <b>BET</b>     | 260                | 100.0 | 21  | 0.09 | 0.05   | 0.13 | 0.3    |
| Low-risk       | 239                | 91.9  | 17  | 0.08 | 0.04   | 0.12 |        |
| Intermed.-risk | 18                 | 6.9   | 4   | 0.19 | 0      | 0.36 |        |
| High-risk      | 3                  | 1.2   | 0   | 0    | 0      | 0    |        |
| <b>ME</b>      | 190                | 100.0 | 19  | 0.12 | 0.06   | 0.17 | 0.1    |
| Low-risk       | 135                | 71.0  | 10  | 0.09 | 0.03   | 0.15 |        |
| Intermed.-risk | 46                 | 24.2  | 7   | 0.18 | 0.05   | 0.3  |        |
| High-risk      | 9                  | 4.8   | 2   | 0.27 | 0      | 0.53 |        |

**C**

| MDAPI          | Number of patients |       | LRR    |        | 95% CI |      | pvalue |
|----------------|--------------------|-------|--------|--------|--------|------|--------|
|                | n                  | %     | w/o DM | w/o DM |        |      |        |
| <b>Overall</b> | 450                | 100.0 | 25     | 0.07   | 0.04   | 0.09 | 0.3    |
| Low-risk       | 374                | 83.1  | 19     | 0.06   | 0.03   | 0.09 |        |
| Intermed.-risk | 64                 | 14.2  | 6      | 0.11   | 0.02   | 0.2  |        |
| High-risk      | 12                 | 2.7   | 0      | 0      | 0      | 0    |        |
| <b>BET</b>     | 260                | 100.0 | 15     | 0.07   | 0.03   | 0.11 | 0.99   |
| Low-risk       | 239                | 91.9  | 14     | 0.07   | 0.03   | 0.11 |        |
| Intermed.-risk | 18                 | 6.9   | 1      | 0.06   | 0      | 0.17 |        |
| High-risk      | 3                  | 1.2   | 0      | 0      | 0      | 0    |        |
| <b>ME</b>      | 190                | 100.0 | 10     | 0.06   | 0.02   | 0.1  | 0.2    |
| Low-risk       | 135                | 71.0  | 5      | 0.04   | 0      | 0.08 |        |
| Intermed.-risk | 46                 | 24.2  | 5      | 0.13   | 0.02   | 0.24 |        |
| High-risk      | 9                  | 4.8   | 0      | 0      | 0      | 0    |        |

**D**

| MDAPI | Number of patients | DM |   | 95% CI |  | pvalue |
|-------|--------------------|----|---|--------|--|--------|
|       |                    | n  | % |        |  |        |

|                       | <b>n</b> | <b>%</b> | <b>n</b> | <b>%</b> |      |      |        |
|-----------------------|----------|----------|----------|----------|------|------|--------|
| <b>Overall</b>        | 450      | 100.0    | 94       | 0.19     | 0.15 | 0.22 |        |
| <b>Low-risk</b>       | 374      | 83.1     | 61       | 0.14     | 0.11 | 0.18 | <0.001 |
| <b>Intermed.-risk</b> | 64       | 14.2     | 26       | 0.34     | 0.22 | 0.44 |        |
| <b>High-risk</b>      | 12       | 2.7      | 7        | 0.61     | 0.21 | 0.81 |        |
| <b>BET</b>            | 260      | 100.0    | 38       | 0.13     | 0.8  | 0.17 |        |
| <b>Low-risk</b>       | 239      | 91.9     | 30       | 0.11     | 0.06 | 0.15 | 0.005  |
| <b>Intermed.-risk</b> | 18       | 6.9      | 6        | 0.23     | 0.04 | 0.39 |        |
| <b>High-risk</b>      | 3        | 1.2      | 2        | 0.72     | 0    | 0.95 |        |
| <b>ME</b>             | 190      | 100.0    | 56       | 0.27     | 0.19 | 0.33 |        |
| <b>Low-risk</b>       | 135      | 71.0     | 31       | 0.21     | 0.13 | 0.27 | 0.06   |
| <b>Intermed.-risk</b> | 46       | 24.2     | 20       | 0.38     | 0.23 | 0.51 |        |
| <b>High-risk</b>      | 9        | 4.8      | 5        | 0.58     | 0.09 | 0.8  |        |
