# Supplementary material for: Prediction of local recurrence risk after neoadjuvant chemotherapy in patients with primary breast cancer: Clinical utility of the MD Anderson Prognostic Index
Source: PubMed Central journal article supplement (PMC6355200; doi:10.1371/journal.pone.0211337), 2019-01-31
Supplement: pone.0211337.s002.pdf [file pone.0211337.s002.pdf]

**S2 Table** Results from univariate and multiple survival analyses on LRRw/oDM

| Variable   | Level | Patients | Events | Univariate |        | Multiple |      |              |
|------------|-------|----------|--------|------------|--------|----------|------|--------------|
|            |       |          |        | HR         | 95% CI | Pvalue   | HR   | 95% CI       |
| Multifocal | 0     | 376      | 18     | Ref.       |        | 0.06     | Ref. | <b>0.008</b> |
|            | 1     | 74       | 7      | 2.31       | 0.96   | 5.53     |      |              |
| MDAPI      | 0     | 220      | 11     | Ref.       |        | 0.70     |      |              |
|            | 1     | 154      | 8      | 0.97       | 0.39   | 2.41     |      |              |
|            | 2     | 64       | 6      | 1.91       | 0.71   | 5.18     |      |              |
|            | 3     | 9        | 0      |            |        |          |      |              |
|            | 4     | 3        | 0      |            |        |          |      |              |

Abbreviations: HR: Hazard ratio; CI: confidence interval

Bold represents probability values under 0.05
